# Supplementary material for: PRMT3-mediated arginine methylation of IGF2BP1 promotes oxaliplatin resistance in liver cancer
Source: Nat Commun. 2023 Apr 6;14:1932. doi: 10.1038/s41467-023-37542-5 (PMC10079833; doi:10.1038/s41467-023-37542-5)
Supplement: Supplementary file 2 — Supplementary Data 1 [file 41467_2023_37542_MOESM2_ESM.xlsx]

## Sheet: Sheet1
Supplementary Data 1：All differentially upregulated genes identified by CRISPR/Cas9 activation library screen.
id	num	pos|score	pos|p-value	pos|fdr	pos|goodsgrna	pos|lfc	pos|rank
NOVA1	3	6.2291e-06	2.169e-05	0.408416	2	7.6448	1
ARID5B	6	6.981e-06	4.3118e-05	0.408416	5	3.8766	2
ALOX5AP	6	3.9409e-05	0.00021193	0.743281	4	4.1132	4
FOSL2	3	4.0013e-05	0.00012674	0.600248	3	4.4588	5
C1orf35	3	8.5472e-05	0.00025636	0.743281	3	4.5572	6
PRMT3	3	9.1395e-05	0.00027465	0.743281	3	3.9817	7
CRHBP	3	0.00015137	0.00046437	0.883089	2	3.887	8
FOXN2	3	0.00016169	0.00049259	0.883089	3	5.9816	9
ZNF709	3	0.00019866	0.00058928	0.883089	2	5.8426	11
ST3GAL1	3	0.00021218	0.00063371	0.883089	2	5.7982	12
C15orf65	3	0.00021501	0.00064155	0.883089	3	4.1642	13
PCDHAC2	6	0.00025117	0.0013795	0.883089	4	3.2475	16
RPL11	3	0.00028769	0.00085792	0.883089	3	5.6829	17
RAP2C	6	0.00029348	0.0016084	0.883089	6	1.9885	18
SLC28A2	3	0.00029922	0.00088719	0.883089	3	3.1017	19
ATXN1	3	0.00032345	0.00096297	0.883089	3	3.6472	21
C9orf64	3	0.00032434	0.00096715	0.883089	2	1.0464	22
GJB4	3	0.00036268	0.0010827	0.883089	2	5.5013	23
TMEM252	3	0.00036758	0.0010968	0.883089	2	1.9886	24
OSR2	3	0.00041081	0.0012123	0.883089	2	2.4279	26
SLU7	3	0.00041949	0.0012483	0.883089	2	5.3419	27
RIPPLY1	3	0.00045405	0.001356	0.883089	2	3.3572	28
SMAD2	6	0.00046949	0.002511	0.883089	5	2.4116	29
TTN	3	0.00050344	0.0014773	0.883089	2	5.2348	31
CAMKK1	6	0.0005402	0.0028617	0.883089	6	1.4149	33
F2RL3	3	0.00054052	0.0015776	0.883089	2	1.5365	34
ATP6V0E2	3	0.00055816	0.0016304	0.883089	2	5.1666	35
PLA2R1	3	0.00057663	0.0016853	0.883089	3	2.7772	36
HK3	3	0.00058777	0.0017156	0.883089	2	4.9084	38
SPRR3	3	0.00059861	0.0017459	0.883089	3	5.1192	40
BEND6	3	0.00063785	0.0018609	0.883089	3	2.8688	41
TRIM44	3	0.00064422	0.0018776	0.883089	3	5.0702	43
MED13	3	0.00069373	0.0020088	0.883089	3	3.4144	46
SLC22A23	6	0.00070622	0.0037377	0.883089	5	1.8448	47
ACBD3	3	0.00072433	0.0020961	0.883089	3	2.7628	49
ATP6V0D2	3	0.00073437	0.0021269	0.883089	2	5.1247	50
SACS	6	0.00073586	0.0038929	0.883089	6	2.7608	51
VPS37B	3	0.00075667	0.002186	0.883089	3	3.8209	52
CHFR	3	0.00076773	0.0022168	0.883089	3	2.4451	53
MAP3K6	3	0.00081622	0.0023506	0.883089	3	3.7933	54
HSPA1B	3	0.00086004	0.0024661	0.883089	3	4.0835	55
ADD1	6	0.00089605	0.0047114	0.883089	4	2.3752	56
STON1	3	0.00090152	0.0025832	0.883089	3	4.8264	57
KCNH6	3	0.00090152	0.0025832	0.883089	2	4.8264	58
ADAM10	3	0.00092958	0.0026684	0.883089	2	1.3611	59
FAM47A	2	0.00093685	0.0017935	0.883089	2	5.2056	60
TAGLN3	6	0.00097653	0.0051081	0.883089	6	1.8051	63
AFAP1	3	0.00098175	0.0028058	0.883089	3	4.4718	64
SULT1C4	3	0.0010004	0.0028607	0.883089	3	2.3821	65
ERAL1	3	0.0010477	0.0030086	0.883089	2	4.7351	67
BAK1	3	0.0010477	0.0030086	0.883089	2	4.7351	68
TAAR6	3	0.0010726	0.0030734	0.883089	2	4.8581	69
LUM	3	0.0010799	0.0030975	0.883089	2	4.7535	70
HIPK2	3	0.0011025	0.003157	0.883089	2	1.5929	71
SHANK2	6	0.0011101	0.005775	0.88501	6	1.9454	73
CYP2J2	3	0.0011142	0.0031853	0.883089	2	4.7033	74
SMAD9	3	0.0011293	0.0032224	0.883089	3	2.5021	75
AASDH	3	0.0011317	0.0032302	0.883089	3	3.3174	76
PLCD4	3	0.0011439	0.0032699	0.883089	3	2.4289	77
DUSP8	3	0.0011683	0.0033394	0.883089	3	4.6708	78
2021-03-02	3	0.0011683	0.0033394	0.883089	3	4.6708	79
CSN3	3	0.0012031	0.0034299	0.883089	3	2.1554	81
RIOK3	3	0.0012149	0.0034617	0.883089	3	2.5013	82
WBP4	2	0.0012172	0.0023663	0.883089	2	3.7617	83
ODAM	3	0.0012753	0.0036259	0.883089	2	1.0853	84
LYRM1	6	0.0012823	0.0065992	0.88501	5	2.1223	85
TADA2B	3	0.0013312	0.00378	0.883089	3	3.2137	86
C6orf223	3	0.0013666	0.0038746	0.883089	3	2.2476	88
TBC1D16	6	0.0014014	0.0071568	0.88501	6	2.6237	89
STYK1	3	0.0014161	0.003998	0.883089	3	4.0129	90
MAP4K5	3	0.0014186	0.0040042	0.883089	2	3.8182	91
AQP4	6	0.0014192	0.0072488	0.88501	5	2.7265	92
MLLT4	3	0.0014204	0.0040084	0.883089	2	4.4525	93
IGSF22	3	0.001488	0.0042023	0.883089	3	4.6009	97
CST11	3	0.0014914	0.0042123	0.883089	2	1.8599	98
UBXN8	3	0.0015223	0.0043095	0.883089	3	4.4964	99
SEMA6A	3	0.0015223	0.0043095	0.883089	2	4.4964	100
CD248	3	0.0015346	0.0043445	0.883089	3	2.5883	101
RTN4IP1	3	0.0015778	0.0044762	0.883089	2	1.7487	102
VWA5B2	3	0.0016118	0.0045755	0.883089	2	4.3743	103
FRK	3	0.001621	0.0046001	0.883089	2	1.592	104
PALB2	3	0.0016283	0.0046299	0.883089	3	2.3827	105
HEXIM1	3	0.0016542	0.00469	0.883089	3	2.9535	106
DPP8	6	0.0016855	0.0085633	0.88501	3	1.2219	108
MVB12B	3	0.0017074	0.0048494	0.883089	2	4.0434	109
BSX	3	0.0017129	0.0048619	0.883089	3	2.7665	110
WDFY3	3	0.0017381	0.0049299	0.883089	3	2.7366	111
CABLES2	3	0.0017722	0.0050255	0.883089	2	1.3309	114
ELMO2	3	0.0017722	0.0050255	0.883089	2	1.5919	115
NDUFV1	3	0.0017787	0.0050448	0.883089	2	4.3675	116
CSMD2	6	0.0017808	0.0089966	0.88501	5	2.1076	117
LRRFIP1	6	0.0017857	0.0090164	0.88501	3	1.676	118
NLRP7	3	0.0017883	0.0050694	0.883089	3	2.0896	119
SLC12A2	3	0.0018049	0.0051149	0.883089	3	3.005	120
TXNDC9	3	0.0018089	0.0051264	0.883089	2	4.3806	121
TRIM45	3	0.0018089	0.0051264	0.883089	2	4.3806	122
SLC7A11	3	0.0018249	0.0051708	0.883089	3	4.2738	123
ZNF174	3	0.0018424	0.005221	0.883089	2	4.3677	125
CMIP	6	0.0019449	0.0097941	0.889871	5	1.736	128
NCL	3	0.001949	0.0055246	0.88501	3	3.5786	129
CSTF2T	3	0.0019551	0.0055413	0.88501	3	2.1661	130
CCDC110	3	0.0019652	0.005568	0.88501	3	3.1347	131
CYP4X1	3	0.0019679	0.0055717	0.88501	3	2.1236	133
GFAP	3	0.0019795	0.0055947	0.88501	3	2.017	134
RHOA	3	0.0020014	0.0056527	0.88501	3	2.9834	135
FIG4	3	0.0020591	0.0058037	0.88501	2	4.4054	137
ATP6V0D1	3	0.0020613	0.0058084	0.88501	3	4.0486	138
NFKBIB	6	0.0020741	0.01042	0.889871	4	2.547	139
OXA1L	3	0.0020745	0.0058455	0.88501	2	3.0206	140
KIAA0195	3	0.0021233	0.0059715	0.88501	3	2.7016	142
SPRN	3	0.0021287	0.0059913	0.88501	3	4.2547	143
NOXO1	3	0.0021393	0.0060196	0.88501	2	1.6614	144
OR5K3	3	0.00216	0.0060734	0.88501	3	3.449	145
CD109	3	0.0021765	0.006123	0.88501	2	4.155	146
SHISA2	3	0.0021912	0.0061617	0.88501	3	2.3725	147
CLDN18	6	0.0022047	0.011059	0.889871	6	1.7075	148
ZNF233	3	0.0022473	0.0063175	0.88501	3	1.0761	150
SLC7A2	6	0.0022555	0.011288	0.889871	5	2.1683	151
ATP5J2	3	0.0022596	0.0063457	0.88501	3	4.1727	152
SDF2L1	3	0.0023552	0.0066217	0.88501	2	2.8292	154
SYCP1	3	0.0023887	0.0067058	0.88501	3	3.7611	155
TRABD2B	3	0.0023984	0.0067246	0.88501	2	1.2533	156
HRK	3	0.0024039	0.0067398	0.88501	3	4.1242	157
DUSP13	6	0.0024121	0.012019	0.894691	5	2.3251	158
XRCC4	3	0.0024433	0.006849	0.88501	3	2.6608	161
CCP110	3	0.0024637	0.0068971	0.88501	3	2.1456	162
SVOPL	6	0.0024837	0.012362	0.894691	4	1.918	163
SH3GL1	6	0.002489	0.012388	0.894691	6	1.4433	165
GRSF1	4	0.0025027	0.0089108	0.88501	3	2.4547	166
SELENBP1	3	0.0025193	0.0070487	0.88501	3	3.515	167
ZNF582	3	0.0025217	0.0070586	0.88501	3	1.84	168
NOC4L	3	0.0025724	0.007195	0.88501	3	3.7261	169
KLF6	3	0.0025848	0.0072321	0.88501	3	2.3351	170
PSMD11	3	0.0025927	0.0072593	0.88501	3	2.6023	171
NPS	3	0.0025927	0.0072593	0.88501	2	3.1118	172
ZFAND3	3	0.0026019	0.0072739	0.88501	3	2.4142	173
PXT1	3	0.0027291	0.0076272	0.88501	3	2.5055	178
LRRC75A	3	0.0027413	0.0076581	0.88501	2	3.667	179
ST6GALNAC4	3	0.0027438	0.0076643	0.88501	3	1.0974	180
TUBB2A	3	0.0027722	0.0077396	0.88501	2	3.7119	181
RTP1	3	0.0027851	0.007773	0.88501	3	4.2211	182
ARL10	3	0.0027955	0.0077997	0.88501	3	1.8929	183
SMARCC1	3	0.0028033	0.0078216	0.88501	3	2.6576	184
ACSBG1	3	0.0028057	0.0078311	0.88501	2	4.0677	185
BCOR	6	0.0028166	0.01395	0.894691	5	2.2485	188
DPP4	3	0.0028473	0.0079481	0.88501	2	3.8025	189
PIP4K2B	3	0.0028621	0.0079905	0.88501	3	2.3561	190
HGSNAT	3	0.0028656	0.0079999	0.88501	3	1.8854	192
AVL9	3	0.0028709	0.0080161	0.88501	2	3.7136	193
EDA	3	0.0028814	0.0080485	0.88501	3	2.1614	195
PPHLN1	3	0.0028928	0.0080819	0.88501	3	2.5669	196
SMARCA5	3	0.0029165	0.0081493	0.88501	2	1.8143	197
SPNS2	3	0.0029515	0.0082382	0.88501	3	3.2937	198
BRINP2	3	0.0029713	0.0082884	0.88501	3	3.7975	199
VTA1	3	0.0029716	0.0082889	0.88501	3	2.0593	200
PRKCQ	3	0.0029999	0.0083683	0.88501	3	1.9191	201
ZNF486	3	0.0030301	0.0084509	0.88501	3	3.7986	202
POC5	6	0.0030346	0.014948	0.911083	5	2.1782	203
NYX	3	0.0030382	0.0084729	0.88501	2	3.6339	204
RAP1GAP	5	0.0030606	0.013119	0.894691	5	2.7022	206
LINGO2	6	0.003078	0.015154	0.911083	3	1.0032	207
SVOP	3	0.0031086	0.0086542	0.88501	2	3.7729	209
PSEN2	3	0.0031323	0.0087284	0.88501	2	2.2009	211
AKAP14	3	0.0031587	0.0087985	0.88501	3	2.3271	212
SRSF9	3	0.0031951	0.0088858	0.88501	3	2.1103	214
FNBP1	3	0.0032157	0.008937	0.88501	2	3.9734	215
NALCN	3	0.0032186	0.0089438	0.88501	3	2.4841	216
FZR1	6	0.0032847	0.016081	0.911083	5	1.7419	217
DLX1	3	0.0033049	0.0091821	0.889871	2	2.0509	218
MAP3K7	3	0.0033925	0.0094053	0.889871	2	3.8903	219
GLTSCR2	3	0.0034021	0.0094283	0.889871	3	2.1467	220
ZG16	3	0.0034031	0.0094298	0.889871	3	2.4597	221
DPM2	3	0.0034128	0.0094575	0.889871	2	2.1895	223
UBN1	6	0.0034646	0.01696	0.917258	6	1.7488	224
C19orf52	3	0.0034697	0.0096112	0.889871	2	3.9446	225
GSAP	3	0.0034894	0.0096629	0.889871	3	2.5169	227
HECTD2	3	0.0034956	0.0096828	0.889871	2	4.0764	228
ARHGEF4	6	0.0035095	0.017158	0.917258	4	1.9409	229
AHSA2	3	0.0035178	0.0097455	0.889871	3	1.8097	230
TMC4	3	0.003555	0.0098542	0.889871	3	2.0201	232
GUCA2A	3	0.003607	0.0099828	0.889871	2	2.4506	234
LRFN3	3	0.0036717	0.010158	0.889871	2	1.922	236
EYA2	3	0.0036736	0.010164	0.889871	2	3.5512	237
TM4SF4	3	0.0036796	0.010181	0.889871	2	3.7895	238
CA3	3	0.0037561	0.01039	0.889871	3	2.2597	240
ARHGAP11A	6	0.0037568	0.018288	0.926174	4	1.2948	241
PLBD2	3	0.0037981	0.010495	0.889871	3	3.2905	242
PLEKHA8	3	0.0038011	0.010504	0.889871	2	2.8757	243
ATP13A5	3	0.0038075	0.010527	0.889871	3	2.3755	246
KCND3	3	0.0038078	0.010527	0.889871	2	3.4671	247
CSNK1G3	6	0.0038414	0.018684	0.926174	5	1.9716	248
MMD	3	0.0039075	0.010798	0.889871	3	2.0747	251
CCBL1	3	0.0039436	0.010887	0.889871	3	2.9956	253
ANP32B	3	0.0039521	0.010917	0.889871	2	3.3079	254
IFNA2	3	0.0039565	0.010929	0.889871	2	3.8527	255
KIAA0391	6	0.0039604	0.019247	0.926174	3	1.5041	256
TMEM132B	6	0.0039608	0.019249	0.926174	4	2.4307	257
IFFO1	3	0.0039804	0.011003	0.889871	3	1.9679	258
NMBR	3	0.0039907	0.011033	0.889871	3	2.0818	259
SULT4A1	3	0.0040088	0.011089	0.889871	2	3.9076	260
SPIN4	3	0.004052	0.011197	0.889871	2	3.9586	262
PDSS2	3	0.004105	0.011323	0.889871	3	2.1045	265
TMPPE	3	0.0041406	0.011415	0.889871	3	1.7798	266
FAM160A1	3	0.0041417	0.011417	0.889871	3	2.2956	267
THEGL	3	0.0041595	0.011462	0.889871	3	2.2313	268
GARNL3	6	0.0041835	0.020222	0.926174	5	2.1668	269
LSM4	3	0.0042109	0.011602	0.889871	2	2.1975	273
KRTAP5-1	2	0.0042196	0.0081844	0.88501	1	3.2191	274
TULP3	3	0.0042259	0.011645	0.889871	3	2.414	275
SLC47A1	3	0.0042276	0.011649	0.889871	3	2.1634	276
MTRNR2L1	3	0.0043187	0.011918	0.894691	3	1.5394	279
DFNA5	6	0.0043732	0.021108	0.926174	6	1.7967	282
PIH1D3	3	0.0043769	0.012078	0.894691	3	2.8492	283
TJP3	6	0.0044362	0.021386	0.926174	5	2.0133	286
GLI3	3	0.0044696	0.012347	0.894691	2	1.7094	287
ADIRF	3	0.0044995	0.012441	0.894691	3	1.7832	288
GLIPR2	6	0.0045497	0.021815	0.926174	5	1.9949	289
PERM1	3	0.0045945	0.012712	0.894691	3	1.8761	291
C17orf49	3	0.004599	0.012727	0.894691	2	2.2835	292
PLK2	3	0.0046136	0.012764	0.894691	3	1.9003	293
TMEM26	3	0.0046172	0.01277	0.894691	3	1.9405	294
GINS4	3	0.0046328	0.012813	0.894691	3	2.1891	295
CPT1A	3	0.0046473	0.012851	0.894691	3	1.687	296
SPHKAP	3	0.0046545	0.012867	0.894691	3	2.1413	297
IRF3	3	0.004675	0.012926	0.894691	2	3.4721	298
OR10H3	2	0.0047374	0.009204	0.889871	1	3.2978	300
PLBD1	3	0.0047419	0.013107	0.894691	3	1.8252	301
IFT43	3	0.0047701	0.013177	0.894691	2	3.7319	303
C8orf33	3	0.0047701	0.013177	0.894691	2	3.7319	304
DAW1	3	0.0047822	0.013206	0.894691	3	3.083	305
AGPAT5	3	0.004793	0.013234	0.894691	2	1.0373	306
KRT13	3	0.0048088	0.013279	0.894691	3	3.2073	307
MYRF	6	0.0048348	0.022848	0.930514	5	1.9495	308
FAM221A	3	0.0048426	0.013363	0.894691	3	3.4563	309
TP53I3	6	0.0048956	0.023067	0.930514	4	1.902	310
SLC9A3R1	3	0.0049073	0.013532	0.894691	3	2.3588	311
FBXL20	3	0.0049547	0.01367	0.894691	2	3.3027	313
ATG10	3	0.0049821	0.013734	0.894691	2	3.5302	315
ALDH1A3	3	0.0049839	0.013736	0.894691	3	1.9018	316
FAM171A1	3	0.0050104	0.013809	0.894691	3	1.9126	318
RNF213	3	0.0050587	0.013941	0.894691	3	3.168	320
MED14OS	3	0.0050681	0.013972	0.894691	2	3.2845	321
HIST1H2AE	3	0.0050948	0.014039	0.894691	3	1.5304	322
ZC3HAV1	3	0.0051041	0.014068	0.894691	3	2.2421	324
DDX43	3	0.0051097	0.014088	0.894691	2	3.3517	325
RPL29	3	0.0051562	0.014209	0.894691	3	2.066	326
USP24	3	0.0051594	0.014216	0.894691	2	1.1269	327
UBFD1	3	0.0052025	0.014339	0.899466	2	1.3676	328
CDC42BPB	3	0.0052456	0.01445	0.903425	2	1.1717	330
ZNF512B	3	0.0053074	0.014618	0.90861	3	1.6897	331
SLC36A4	6	0.0053251	0.024573	0.936856	4	1.7151	332
ZDHHC15	3	0.0053318	0.014677	0.90861	2	1.1174	333
LHCGR	3	0.005398	0.014843	0.911083	3	3.3517	336
PLXNA3	3	0.0054301	0.014925	0.911083	2	3.4166	337
SRF	3	0.0054361	0.014943	0.911083	3	1.8257	338
C1QTNF6	3	0.0055099	0.015127	0.911083	3	2.7597	340
IMP3	3	0.0055468	0.015214	0.911083	2	3.6647	341
CCDC74A	3	0.005624	0.01542	0.911083	3	1.8546	344
OR3A3	3	0.0056429	0.015471	0.911083	2	3.4831	345
OR1J4	3	0.0057159	0.01567	0.911083	2	3.6585	346
DNAJC25-GNG10	3	0.0057259	0.015697	0.911083	3	1.9693	347
AGTR1	6	0.0057553	0.026101	0.936856	5	1.2605	348
MBTPS2	3	0.0057661	0.015806	0.911083	3	3.5009	350
TBCB	3	0.0057747	0.01583	0.911083	2	3.1899	351
UGT2B28	3	0.0057772	0.015839	0.911083	3	1.9673	352
PCDHA8	3	0.0057931	0.015878	0.911083	3	3.4485	353
GDF5	3	0.0058058	0.015914	0.911083	2	2.647	354
C7orf26	3	0.0058345	0.015988	0.911083	3	1.7323	355
IPPK	3	0.0058359	0.015993	0.911083	3	2.1113	356
PTPRU	3	0.0058704	0.016076	0.911083	2	2.3554	358
GHRL	6	0.0059036	0.026625	0.936856	5	1.8101	359
LRFN4	3	0.0059042	0.016159	0.911083	2	3.6001	360
ASAH2B	3	0.0059042	0.016159	0.911083	3	3.6001	361
DDX27	3	0.0059042	0.016159	0.911083	2	3.6001	362
GMEB2	3	0.0059908	0.016399	0.917258	3	1.7683	365
LY6G6C	2	0.0060026	0.011579	0.889871	2	4.407	366
USP14	3	0.0060244	0.016487	0.917258	3	1.8475	367
SCRT2	3	0.0060502	0.016544	0.917258	2	3.4101	368
KRTAP12-3	3	0.0060643	0.016581	0.917258	2	1.6762	369
OR6M1	3	0.0061353	0.016772	0.917258	3	3.2079	370
ADM	3	0.0061469	0.016801	0.917258	3	1.6678	371
SPTLC1	3	0.0061522	0.016818	0.917258	3	3.6001	373
SULT1C2	3	0.0061935	0.016928	0.917258	3	2.5591	375
CTNNA1	6	0.0062142	0.027714	0.939123	3	1.289	377
ENPP5	3	0.0062513	0.017077	0.917258	2	3.0224	378
C17orf47	2	0.0062613	0.012036	0.894691	2	3.7647	379
HIST1H4F	3	0.0062711	0.017125	0.917258	3	1.9797	380
NAA40	3	0.0062819	0.017151	0.917258	2	2.9985	382
OVGP1	3	0.0062858	0.01716	0.917258	2	3.589	383
HERC3	3	0.0063405	0.017301	0.917258	3	1.874	384
TBC1D10C	3	0.0063583	0.017352	0.917258	3	2.1854	386
NUPR1L	3	0.0063657	0.017377	0.917258	3	1.3759	387
FAM57B	3	0.0063704	0.01739	0.917258	2	3.4173	388
ABCA1	3	0.0063743	0.017402	0.917258	2	3.0588	389
LCA5	3	0.0063835	0.017431	0.917258	3	2.1545	390
ARSG	5	0.0064364	0.026404	0.936856	3	2.1956	391
SLC28A1	3	0.006444	0.017585	0.922808	2	2.7997	392
DENND2D	6	0.0064519	0.028592	0.939642	5	1.3738	393
FOXD4L4	2	0.0064817	0.012439	0.894691	2	3.883	394
CD81	3	0.0065207	0.01776	0.926174	3	1.6998	395
SPATA31C2	3	0.0065218	0.017761	0.926174	2	2.8784	396
ZNF141	3	0.0066217	0.018041	0.926174	2	3.2393	398
SLC6A13	3	0.0066414	0.018093	0.926174	3	1.9877	399
APLP2	6	0.0067336	0.029558	0.942848	4	2.3292	403
PRPF4B	3	0.0067533	0.01838	0.926174	2	2.5669	404
EBF2	3	0.0068001	0.018519	0.926174	3	1.6014	405
LRRC30	3	0.0068125	0.018549	0.926174	3	1.8556	406
C14orf1	3	0.0068378	0.018613	0.926174	2	3.0018	408
KANK3	2	0.0068644	0.013152	0.894691	2	2.8957	410
PRDM8	6	0.0069103	0.030186	0.944687	5	1.7083	413
TUBB4A	6	0.0069199	0.03022	0.944687	5	1.8542	414
C19orf81	3	0.0069486	0.018906	0.926174	3	1.362	415
CDC42	3	0.0069901	0.019016	0.926174	2	2.1317	416
YEATS2	3	0.0069904	0.019017	0.926174	2	3.1521	417
SLC25A29	3	0.0070267	0.019105	0.926174	3	2.9955	418
BACH1	5	0.0070577	0.028744	0.940449	3	2.1923	419
ITLN1	3	0.0071425	0.019411	0.926174	3	1.4158	421
LRRC4	3	0.0071763	0.019502	0.926174	3	3.1967	422
GRTP1	3	0.0071772	0.019507	0.926174	2	3.5335	423
NCOA2	3	0.0071803	0.019518	0.926174	3	1.8456	424
H1FNT	3	0.0071838	0.019531	0.926174	3	1.7636	425
C21orf2	6	0.0071906	0.031163	0.94562	4	1.7782	426
TENM3	3	0.0071977	0.019565	0.926174	2	3.418	427
DEFB130	1	0.0072155	0.0071568	0.88501	1	5.8571	428
ADCY8	3	0.007251	0.019708	0.926174	3	3.0441	429
DNAJB7	3	0.0072634	0.019735	0.926174	2	2.9778	430
C5orf30	3	0.0072651	0.01974	0.926174	3	2.5039	431
KRTAP5-5	3	0.0072698	0.019746	0.926174	3	2.3396	433
RECQL4	3	0.007283	0.01978	0.926174	3	1.4886	434
PLD4	3	0.0073245	0.019888	0.926174	3	2.1257	435
PRPF39	3	0.0073417	0.01993	0.926174	2	3.3105	436
PRRX1	3	0.007399	0.020067	0.926174	3	1.8021	437
XPNPEP2	3	0.0074205	0.020125	0.926174	2	1.8296	438
FANCE	2	0.0074251	0.014149	0.894691	1	3.3367	439
KCNJ12	3	0.007455	0.020212	0.926174	3	1.5598	440
PRPF6	3	0.0074913	0.020313	0.926174	3	2.9816	441
HSF1	3	0.0075046	0.020349	0.926174	3	1.8676	442
RIT2	3	0.0075281	0.020412	0.926174	2	1.1777	443
APOLD1	6	0.0075637	0.03249	0.94562	5	1.6972	444
DNAJC5	3	0.0075711	0.020517	0.926174	2	1.0486	445
SLC5A7	3	0.0076043	0.02061	0.926174	3	3.1809	447
C16orf97	3	0.0076085	0.020621	0.926174	2	3.3743	448
TMEM86A	3	0.0076112	0.020629	0.926174	3	1.9	449
TEX264	6	0.0076532	0.032801	0.94562	5	1.5581	452
WDR12	1	0.0076624	0.0075964	0.88501	1	5.9138	453
MB21D2	3	0.0076633	0.020761	0.926174	3	3.0497	454
ZNF470	3	0.0076844	0.020824	0.926174	2	2.9891	455
OR4Q3	3	0.0076886	0.020836	0.926174	2	3.101	456
NBPF15	6	0.0076977	0.032957	0.94562	5	1.5826	457
TMEM130	3	0.0077289	0.020935	0.926174	2	3.5526	459
DDX52	3	0.0078087	0.021156	0.926174	3	1.7889	462
LRRC7	3	0.0078245	0.021196	0.926174	2	2.7941	463
NKX2-1	6	0.0078325	0.033418	0.94562	4	2.1932	464
ABCD2	3	0.007841	0.021241	0.926174	3	1.912	465
PTHLH	6	0.0078609	0.033522	0.94562	4	1.695	466
ADAMTS9	3	0.0078629	0.021291	0.926174	2	2.8902	467
ADAM18	3	0.0078735	0.021326	0.926174	3	1.9656	471
OR5L2	3	0.00788	0.021338	0.926174	2	3.2984	472
PDPK1	3	0.0079099	0.021418	0.926174	2	2.9443	473
HARS	3	0.0079142	0.021429	0.926174	3	3.1695	474
CCDC15	3	0.0079396	0.021492	0.926174	3	1.6317	475
ENOX1	6	0.0079519	0.033838	0.94562	4	1.6222	476
PET100	3	0.0079571	0.021531	0.926174	2	2.6987	477
ARHGEF16	3	0.0079853	0.021616	0.926174	3	2.2156	479
AP3D1	3	0.0080199	0.021697	0.926174	3	1.6968	480
KCNMB4	3	0.0080268	0.021716	0.926174	3	2.0808	482
OR4C3	3	0.0080677	0.021829	0.926174	3	1.7706	483
GMEB1	3	0.0080964	0.021903	0.926174	3	1.9636	485
PSMD2	6	0.0081228	0.034438	0.94562	4	1.8523	486
RPF1	3	0.0081519	0.022038	0.927519	3	1.4815	487
ANKRD12	6	0.0081547	0.034549	0.94562	4	2.0813	488
TRIM62	3	0.0081699	0.022079	0.927519	3	2.7062	490
HSD17B3	2	0.0081862	0.015536	0.911083	1	3.101	491
ALKBH6	3	0.0082213	0.022214	0.927519	2	3.1692	492
OR1N1	3	0.0082257	0.022223	0.927519	2	3.3119	493
PRDX1	6	0.0082381	0.034822	0.94562	5	1.7335	494
BTN3A1	3	0.0082694	0.022342	0.927519	2	3.1458	498
MFAP3	3	0.0082827	0.022375	0.927519	3	1.2936	499
FAM186A	3	0.0083128	0.022448	0.92852	3	2.5379	500
ASNS	6	0.0083634	0.035239	0.94562	3	1.291	501
MAP4K2	3	0.0083924	0.022655	0.930514	2	2.7546	502
ZBTB47	3	0.0084315	0.02275	0.930514	2	2.522	503
LYN	3	0.0084735	0.022861	0.930514	3	2.3036	504
ITGA7	6	0.0084811	0.035639	0.94562	4	1.6461	505
ENGASE	3	0.0085204	0.02298	0.930514	3	2.5338	507
PLS3	6	0.0085381	0.035839	0.94562	4	1.3823	508
APCDD1	3	0.0085438	0.023036	0.930514	3	1.4145	509
TSNAX	3	0.0085605	0.023086	0.930514	2	1.816	511
BSN	3	0.0087002	0.023434	0.932789	3	1.6635	515
TUBB3	6	0.0087243	0.036472	0.945802	5	1.082	516
CTF1	3	0.0088072	0.023688	0.932789	2	3.1619	517
RHOD	3	0.0088185	0.023714	0.932789	2	1.3418	518
SLC27A4	3	0.0088185	0.023714	0.932789	2	1.8924	519
MYOD1	3	0.0088308	0.023747	0.932789	3	2.4527	522
EMILIN2	3	0.0088382	0.023767	0.932789	3	1.5586	523
MAPRE1	3	0.0089235	0.023996	0.932789	3	1.438	525
FAM160B2	2	0.0089425	0.016971	0.917258	2	2.9453	526
CHD4	3	0.0089474	0.024053	0.932789	2	1.6215	527
OR52E8	3	0.0089567	0.024078	0.932789	2	2.6277	528
CCBE1	3	0.00903	0.02428	0.935362	3	2.217	529
TRMT5	3	0.0090375	0.024301	0.935362	3	1.8377	531
VPS13D	3	0.0090544	0.024342	0.935362	3	1.7535	532
ZDHHC23	3	0.0091316	0.024548	0.936856	3	1.6504	534
SLC25A11	3	0.0091625	0.024631	0.936856	2	2.8417	536
OR6T1	3	0.0092274	0.024798	0.936856	3	2.9683	538
PPAPDC1A	3	0.0092431	0.024847	0.936856	2	3.4097	539
ASB12	3	0.0092484	0.024861	0.936856	2	1.0561	540
SLC20A1	3	0.0092593	0.024891	0.936856	3	3.0785	541
FKBP8	3	0.0092871	0.024959	0.936856	2	3.3346	542
NMB	3	0.0093128	0.025019	0.936856	2	2.5534	543
HAUS4	3	0.0093161	0.025033	0.936856	3	1.5669	544
ZNF99	2	0.0094261	0.017864	0.926174	2	2.3479	546
APOBEC3C	3	0.0094847	0.025448	0.936856	3	2.6879	547
UBXN11	6	0.009498	0.03907	0.964477	5	1.7312	548
UQCR10	3	0.0095316	0.025571	0.936856	2	3.2915	549
TRPT1	6	0.0096054	0.039431	0.964477	4	1.6153	551
HIST1H2BB	3	0.0096137	0.025772	0.936856	2	2.4287	552
NF1	3	0.0096326	0.025826	0.936856	2	2.8376	553
MAK16	3	0.0096494	0.025869	0.936856	3	1.4809	554
CRIP2	6	0.0096804	0.039694	0.964477	3	1.3797	555
ZNF618	3	0.0096844	0.025963	0.936856	3	2.9709	556
RSF1	3	0.0096965	0.025992	0.936856	3	1.4876	557
WTH3DI	3	0.0096996	0.025999	0.936856	3	1.519	559
SGSM1	3	0.0097024	0.026009	0.936856	3	1.495	560
TPP1	3	0.0097103	0.026028	0.936856	3	2.132	561
HS3ST1	3	0.0097714	0.026205	0.936856	3	1.3644	563
MFSD6L	3	0.0097744	0.026212	0.936856	3	2.7048	564
WARS	6	0.0097776	0.040048	0.964477	4	1.0737	565
TRIM73	3	0.009807	0.02629	0.936856	3	2.3683	566
MIER2	3	0.009819	0.026316	0.936856	3	2.7736	567
HEBP2	3	0.0098368	0.026364	0.936856	3	1.5815	569
FGF21	3	0.0098467	0.026387	0.936856	3	1.5257	570
PAFAH2	3	0.00985	0.026397	0.936856	2	2.5485	571
MPP6	3	0.009898	0.026517	0.936856	3	2.7764	573
ECI2	6	0.0099495	0.040652	0.964477	5	1.632	575
TMEM9	6	0.0099696	0.040714	0.964477	3	1.1464	576
KIAA1958	3	0.0099789	0.026716	0.936856	2	1.6745	578
DSP	3	0.0099889	0.026743	0.936856	3	2.978	580
TMOD1	6	0.010008	0.040855	0.964477	4	1.5657	581
CDK11B	3	0.010017	0.026815	0.936856	3	2.3863	582
PLEKHM1	3	0.010039	0.026873	0.936856	3	1.5133	584
WRAP73	3	0.010055	0.02691	0.936856	3	1.9326	585
FERMT1	3	0.010073	0.026961	0.936856	3	1.6806	587
DCTN4	6	0.010091	0.041124	0.964477	4	1.6722	589
ADCY2	3	0.010099	0.02703	0.936856	2	2.9908	590
KRTAP9-1	3	0.010108	0.02705	0.936856	2	1.0458	591
THEG	3	0.010109	0.027051	0.936856	2	2.7262	592
PIEZO1	3	0.010128	0.027101	0.936863	3	1.7751	593
SLPI	2	0.010138	0.01918	0.926174	1	2.0522	594
IER5	3	0.010203	0.027295	0.939123	3	1.4851	595
IFNE	3	0.010259	0.027437	0.939123	2	2.8476	597
C1QTNF3	2	0.010279	0.019443	0.926174	2	2.3195	598
NFKBIA	3	0.010282	0.027501	0.939123	3	1.6717	599
XCR1	3	0.010327	0.027613	0.939123	3	1.2706	601
RNF7	3	0.01035	0.027674	0.939123	3	1.7597	602
TMEM181	3	0.010361	0.027714	0.939123	2	2.6532	603
UBR4	3	0.010379	0.027758	0.939123	3	1.4721	604
DAPP1	3	0.010403	0.027821	0.939123	3	2.5583	605
ARFGEF1	3	0.01042	0.02786	0.939123	3	2.6421	607
RAD51C	3	0.010483	0.028005	0.939642	2	2.5398	608
ATP5C1	3	0.010556	0.028192	0.939642	3	2.3193	611
SSR3	3	0.010556	0.028192	0.939642	3	1.7707	612
LSM1	3	0.01057	0.028231	0.939642	3	1.517	613
SKIL	6	0.010577	0.042735	0.964477	4	1.7352	614
FLJ44313	3	0.010616	0.028345	0.939642	3	1.79	615
C7orf31	3	0.010656	0.028457	0.939642	2	2.7752	618
TMEM196	3	0.010666	0.028481	0.939642	2	2.8568	619
CDYL2	3	0.010674	0.0285	0.939642	3	1.5008	620
KIAA1467	3	0.010709	0.028594	0.939642	3	1.6868	621
HMG20B	3	0.01072	0.02862	0.939642	3	1.4443	622
NCKIPSD	3	0.010752	0.028707	0.940449	2	1.6969	623
LYRM2	3	0.010819	0.028884	0.942307	2	3.1932	626
COX5B	3	0.010825	0.0289	0.942307	3	1.5971	627
TLCD2	3	0.010849	0.028955	0.942352	2	2.6402	628
MYEF2	3	0.010864	0.029001	0.942352	2	2.9265	629
ACTG1	3	0.010945	0.029222	0.942848	2	2.4096	631
WFIKKN1	3	0.01101	0.029379	0.942848	2	1.3964	632
NGEF	6	0.011015	0.04416	0.964477	5	1.4614	633
PITPNM3	3	0.01105	0.029474	0.942848	2	3.2056	634
PGBD1	3	0.01105	0.029474	0.942848	3	3.2056	635
SLC26A9	3	0.011062	0.029504	0.942848	3	1.3357	637
LUC7L	3	0.011159	0.029735	0.942848	3	1.1975	640
GPRC5D	3	0.011176	0.029776	0.942848	2	3.1033	641
ACO2	3	0.011191	0.029813	0.942848	2	3.0002	642
RDH11	3	0.011204	0.029843	0.942848	3	1.3246	643
CCDC86	3	0.011209	0.029851	0.942848	3	1.358	644
ELFN1	3	0.011216	0.029872	0.942848	3	3.2817	645
SNTN	3	0.011248	0.029952	0.942848	3	2.3578	648
ANKRD10	3	0.011277	0.030024	0.942848	2	3.1045	649
PCGF2	3	0.011282	0.030037	0.942848	2	3.0304	650
UTY	3	0.011293	0.030061	0.942848	3	1.9003	651
ABHD6	3	0.011396	0.030318	0.945407	3	1.2767	653
ATP2B3	3	0.011409	0.030351	0.945407	3	1.2262	655
SH3BGRL3	3	0.01144	0.030424	0.945407	2	2.7998	656
FBN3	3	0.011448	0.030442	0.945407	3	1.4691	657
TNS1	3	0.011486	0.030538	0.94562	3	1.4122	658
CSNK2A3	3	0.011495	0.030556	0.94562	3	3.1111	659
FAM69A	6	0.011542	0.045932	0.964477	4	1.4264	661
ATP1B1	3	0.011565	0.030722	0.94562	3	1.2974	663
RPS4Y2	3	0.011611	0.030844	0.94562	3	2.0313	664
ADRB3	3	0.011623	0.030872	0.94562	3	1.407	665
CCDC80	3	0.011676	0.03101	0.94562	3	1.9702	666
CLEC3B	3	0.011696	0.031056	0.94562	2	1.5927	667
DDX31	3	0.011719	0.031108	0.94562	3	1.3422	670
PPP1R3F	3	0.011752	0.031188	0.94562	3	2.1213	671
FER1L6	3	0.011754	0.031195	0.94562	2	3.2044	672
PACSIN3	6	0.011793	0.046788	0.964477	5	1.4427	673
SNRPA	3	0.011814	0.03135	0.94562	2	3.2147	674
FKBP10	3	0.011825	0.031383	0.94562	2	1.0275	676
TMEM246	3	0.011825	0.031383	0.94562	2	2.2903	677
CHMP5	3	0.011828	0.031387	0.94562	3	1.3948	679
NMNAT3	3	0.011835	0.031405	0.94562	3	1.7329	680
SFRP2	3	0.011858	0.031465	0.94562	3	2.5304	681
FAM114A2	3	0.011891	0.031547	0.94562	3	1.1954	682
IPO5	3	0.011923	0.031626	0.94562	3	2.2613	683
NGRN	3	0.011954	0.031705	0.94562	2	1.5456	684
PNLIPRP1	3	0.011991	0.031789	0.94562	3	1.3234	685
SOSTDC1	3	0.011997	0.031806	0.94562	2	2.5349	686
TFAM	3	0.012016	0.031849	0.94562	3	1.2691	687
NAA11	2	0.012016	0.022682	0.930514	1	3.1088	688
TANGO2	6	0.012022	0.047531	0.965983	4	1.6337	689
ADH4	3	0.01204	0.031908	0.94562	3	2.4985	690
DAGLA	3	0.012077	0.032012	0.94562	2	2.8542	691
VPS54	3	0.012111	0.032102	0.94562	3	1.6195	692
CACNA1E	3	0.012127	0.03214	0.94562	3	2.1127	693
MYL2	3	0.012225	0.032383	0.94562	2	2.8295	695
SLITRK2	6	0.012271	0.048359	0.967904	3	1.2276	697
CD300LD	3	0.012299	0.032562	0.94562	2	2.5975	698
ATP5H	3	0.012305	0.032582	0.94562	3	1.4123	699
CDX1	3	0.01234	0.032656	0.94562	3	1.4591	700
WDR63	3	0.012437	0.032891	0.94562	3	2.562	703
COMTD1	3	0.012461	0.032944	0.94562	3	1.8598	704
IDH3A	3	0.012463	0.032949	0.94562	3	1.6129	705
SPINK13	3	0.012527	0.033117	0.94562	2	2.8188	707
EEF1A2	3	0.012558	0.033189	0.94562	3	1.3958	708
MED16	2	0.01256	0.023677	0.932789	2	3.407	709
SAMD9L	3	0.012576	0.033228	0.94562	2	1.3155	710
LRRC37A3	3	0.012597	0.033282	0.94562	2	2.4152	713
SLC15A4	3	0.012686	0.033501	0.94562	3	1.3087	715
KLHL9	3	0.012688	0.03351	0.94562	3	3.0306	716
SAP30L	3	0.012728	0.033625	0.94562	2	2.4158	718
DDB2	3	0.012728	0.033625	0.94562	3	3.1118	719
ARHGEF35	2	0.012732	0.02399	0.932789	2	3.3193	720
C7orf62	2	0.012732	0.02399	0.932789	1	3.0577	721
CD79A	3	0.012735	0.033643	0.94562	3	1.3246	722
RPL13	5	0.012893	0.048407	0.967904	4	1.2969	728
ARL14EPL	3	0.012904	0.034065	0.94562	3	2.7789	729
TEX30	3	0.01292	0.034111	0.94562	3	2.977	730
YME1L1	3	0.012962	0.034215	0.94562	2	2.2651	731
VPS33A	3	0.012962	0.034215	0.94562	3	1.9947	732
SH3TC2	3	0.012962	0.034215	0.94562	2	1.2128	733
GPR149	3	0.013051	0.034422	0.94562	3	1.2917	734
MEDAG	3	0.013053	0.034427	0.94562	2	2.8208	735
STRA13	3	0.013063	0.034449	0.94562	3	1.5932	736
PALM3	3	0.013088	0.034514	0.94562	2	2.8848	737
FER1L5	3	0.013107	0.034555	0.94562	3	1.8188	738
PPFIA4	3	0.013132	0.034618	0.94562	3	3.031	742
TMPRSS5	3	0.013225	0.034858	0.94562	2	2.6581	744
BOD1L2	3	0.01324	0.034895	0.94562	2	1.7294	745
BMP8A	3	0.013263	0.034944	0.94562	2	2.8474	746
OR4P4	3	0.013268	0.034963	0.94562	3	2.6184	747
PPFIBP1	3	0.013269	0.034963	0.94562	2	3.0088	748
INHBE	3	0.013336	0.03513	0.94562	3	1.3941	750
FUT6	3	0.013429	0.035367	0.94562	3	1.9856	755
CCDC11	3	0.013439	0.035396	0.94562	3	1.3916	756
FAM126B	3	0.013485	0.035505	0.94562	3	1.8498	757
ITGA11	3	0.013498	0.035527	0.94562	2	1.6235	759
WNT10B	3	0.0135	0.035534	0.94562	3	2.5767	761
SNX19	3	0.013529	0.0356	0.94562	3	1.9731	763
CRHR1	4	0.01355	0.04442	0.964477	3	1.7052	764
LIN28B	3	0.013552	0.035657	0.94562	3	1.5813	765
MMP1	3	0.013567	0.03569	0.94562	2	2.8506	766
ZNF595	1	0.013602	0.013485	0.894691	1	4.5339	767
GPR112	3	0.013606	0.035797	0.94562	2	2.8817	768
NEDD8	3	0.013618	0.035828	0.94562	3	1.0562	769
DPF2	3	0.013648	0.035913	0.94562	2	1.3132	770
DHRS7B	3	0.013667	0.035966	0.94562	2	2.3869	771
CRK	3	0.013678	0.035993	0.94562	2	2.4833	772
PCSK9	3	0.013694	0.036031	0.94562	2	3.0522	773
UBE2U	3	0.013712	0.036081	0.94562	2	1.1134	774
PLXND1	3	0.013742	0.036146	0.94562	3	1.7997	775
HS6ST1	3	0.013747	0.036162	0.94562	3	1.2878	776
INSIG2	3	0.013761	0.036202	0.94562	3	2.8256	778
MOB3A	3	0.013762	0.036202	0.94562	3	1.3167	779
UTS2B	3	0.013856	0.03645	0.945802	3	1.7262	782
FAM81B	3	0.013868	0.036478	0.945802	2	2.8897	783
CBLC	3	0.013873	0.036496	0.945802	2	2.6753	784
RPS2	3	0.013935	0.036655	0.948622	3	2.3637	785
PER2	3	0.014112	0.037085	0.952471	3	1.3545	788
LENG1	3	0.014132	0.037135	0.952471	2	3.1361	791
EID1	3	0.014143	0.037156	0.952471	3	1.6939	792
MRPS21	3	0.014177	0.037238	0.953285	2	2.4677	793
WDR24	3	0.014234	0.037388	0.955846	3	2.4463	796
SPOPL	3	0.014302	0.037571	0.956316	3	1.7275	797
CASC3	3	0.014365	0.037724	0.956316	3	1.63	799
ETV6	3	0.014426	0.037873	0.956316	3	2.12	801
ZNF512	3	0.014428	0.037877	0.956316	2	2.7013	802
MUC2	3	0.014439	0.03791	0.956316	2	2.886	803
PYY	3	0.01444	0.037911	0.956316	3	1.4013	804
RPL36	4	0.014529	0.047476	0.965983	4	1.4858	808
MYBL2	3	0.014577	0.038264	0.957816	3	2.0407	811
IL23R	3	0.014587	0.038297	0.957816	3	1.4837	812
RIMS4	3	0.014599	0.038325	0.957816	3	1.7993	814
STAG1	3	0.014697	0.038568	0.961354	2	1.5489	817
NHSL2	3	0.014847	0.038929	0.964477	2	1.5151	821
TUBA1A	3	0.014975	0.03924	0.964477	2	1.4495	822
SLC6A1	3	0.014975	0.03924	0.964477	2	1.3652	823
TXNDC2	3	0.015016	0.039333	0.964477	3	2.873	824
SMIM21	3	0.015031	0.039369	0.964477	3	1.2169	825
PROX2	3	0.015109	0.039581	0.964477	2	2.9491	829
ZC3H7A	3	0.015109	0.039581	0.964477	2	3.0116	830
RNF151	3	0.015218	0.039841	0.964477	3	1.7787	831
CPNE7	3	0.015282	0.03999	0.964477	3	1.696	833
TGM6	3	0.01529	0.040007	0.964477	3	1.3261	834
BAIAP2L1	3	0.015322	0.040091	0.964477	3	1.4064	836
EVPLL	3	0.015476	0.040468	0.964477	3	1.2256	840
ZFP28	3	0.015511	0.040548	0.964477	3	2.0715	841
VRK3	3	0.01552	0.04057	0.964477	3	1.5818	842
THBS1	3	0.015553	0.040641	0.964477	2	2.1432	843
FAM83D	3	0.015572	0.040688	0.964477	3	1.773	844
SLTM	3	0.015573	0.040691	0.964477	2	2.4437	845
CDK20	3	0.015591	0.040728	0.964477	2	2.9319	846
PIAS2	3	0.015597	0.040747	0.964477	2	2.6133	847
CRAMP1L	3	0.015668	0.040936	0.964477	3	2.3851	848
SNX25	3	0.015725	0.04108	0.964477	2	1.9377	851
SRP72	3	0.015742	0.041123	0.964477	3	2.3934	852
GRIK5	3	0.015781	0.041216	0.964477	2	2.6453	854
GLB1L3	3	0.015791	0.041242	0.964477	3	1.435	855
VN1R2	3	0.015818	0.041309	0.964477	3	1.5805	856
ACOT8	3	0.015858	0.041414	0.964477	2	2.806	858
WDR91	3	0.015981	0.041716	0.964477	2	1.7287	861
ZSWIM4	3	0.015981	0.041716	0.964477	2	2.4898	862
SMCO4	3	0.015996	0.041745	0.964477	2	2.4603	866
SNX9	3	0.01602	0.041799	0.964477	3	2.5572	867
SCGB1D2	3	0.01605	0.041874	0.964477	2	2.3848	869
CLDN16	3	0.016059	0.041899	0.964477	3	1.4386	870
CDK8	3	0.016068	0.041928	0.964477	2	2.5871	871
UNC5D	3	0.016074	0.041945	0.964477	2	2.6412	872
RPL28	3	0.01608	0.041956	0.964477	2	2.2991	873
SNRNP200	3	0.016092	0.041979	0.964477	2	2.544	874
HOXC8	3	0.016192	0.04224	0.964477	3	2.2716	875
POC1A	3	0.016217	0.042304	0.964477	2	1.8705	878
DOLK	3	0.016233	0.04234	0.964477	3	1.3826	881
PCDHGB3	3	0.016291	0.042497	0.964477	2	2.7193	883
GPC4	3	0.016327	0.042589	0.964477	2	2.4063	884
FAT4	3	0.016352	0.042658	0.964477	2	2.7961	886
SLC32A1	3	0.016449	0.042897	0.964477	2	2.2547	887
GOLGA4	3	0.016473	0.042971	0.964477	3	1.7751	888
NLRP11	3	0.016489	0.043004	0.964477	3	1.3084	889
XPC	3	0.016501	0.043037	0.964477	3	1.3982	890
ACTL9	3	0.016515	0.043068	0.964477	3	1.18	891
LPPR5	3	0.016522	0.04308	0.964477	2	2.5255	892
2021-03-06	3	0.016526	0.043094	0.964477	3	1.4904	893
SYCE1L	3	0.016577	0.043218	0.964477	3	2.1799	894
ZNF20	3	0.016583	0.043233	0.964477	3	1.3042	895
FNIP2	3	0.016595	0.043259	0.964477	2	2.4692	896
PHF21A	3	0.016674	0.043435	0.964477	3	2.6741	897
TARSL2	3	0.016678	0.043446	0.964477	3	1.3479	898
HMGN2	3	0.016738	0.043605	0.964477	2	2.8886	900
REG1A	3	0.016754	0.043645	0.964477	2	2.5538	901
CASQ1	3	0.016815	0.04378	0.964477	2	1.8043	902
WBSCR28	3	0.016846	0.043853	0.964477	2	2.5713	904
DMAP1	3	0.016852	0.043867	0.964477	2	2.3619	905
KRT39	3	0.016901	0.043991	0.964477	3	2.9005	907
PITHD1	3	0.016922	0.044051	0.964477	3	1.1869	908
FADS6	3	0.016922	0.044051	0.964477	3	1.23	909
IL9R	3	0.016982	0.044203	0.964477	3	1.82	914
DNHD1	3	0.016993	0.04423	0.964477	2	2.3758	915
ZNF665	3	0.017017	0.044272	0.964477	3	2.2369	917
KCNK4	3	0.01703	0.044306	0.964477	3	2.4856	918
VSTM4	3	0.017045	0.044341	0.964477	3	1.2993	919
CREB3L3	3	0.017085	0.044436	0.964477	3	1.7811	921
GALNTL6	3	0.017117	0.044523	0.964477	3	1.3061	922
TECPR1	3	0.01716	0.044635	0.964477	3	2.4337	925
TUBB6	3	0.017247	0.044851	0.964477	2	2.6985	927
FAM174A	3	0.01727	0.044904	0.964477	3	1.5968	928
ZNF507	3	0.017307	0.044996	0.964477	3	1.2363	932
TRIM58	3	0.017309	0.044999	0.964477	2	2.867	933
HNRNPLL	3	0.01733	0.045051	0.964477	3	1.1404	934
ZNF676	3	0.01747	0.045411	0.964477	3	1.7467	936
CCDC138	3	0.017499	0.045474	0.964477	2	1.2434	937
NXPH1	3	0.017505	0.045488	0.964477	3	1.721	938
PISD	3	0.017534	0.045566	0.964477	2	2.2424	940
AVP	3	0.017569	0.045655	0.964477	3	1.1831	942
TGFB1	3	0.017578	0.045674	0.964477	3	1.1169	943
ALKBH2	3	0.017615	0.045772	0.964477	3	2.7007	944
RAPGEFL1	3	0.017653	0.045876	0.964477	2	2.4967	945
FAM20B	3	0.017663	0.045901	0.964477	3	1.3246	946
ZNF568	3	0.017674	0.045932	0.964477	3	1.5187	947
ACP6	3	0.017698	0.045992	0.964477	3	1.5288	948
TRMT61A	3	0.017707	0.046019	0.964477	3	1.7237	949
HAUS5	3	0.017713	0.046035	0.964477	2	2.5944	950
TGOLN2	3	0.017751	0.046129	0.964477	3	1.281	953
ZNF766	3	0.017786	0.046218	0.964477	3	1.0885	955
ALDH8A1	3	0.017798	0.046247	0.964477	2	2.4959	956
C3orf67	3	0.017836	0.046345	0.964477	2	2.2046	957
SLC22A13	3	0.017855	0.046387	0.964477	2	2.241	958
TAF15	3	0.017867	0.046415	0.964477	2	2.1847	959
ZNF786	3	0.017899	0.046485	0.964477	2	2.6738	960
C11orf73	3	0.017922	0.046532	0.964477	3	1.099	962
GAB3	3	0.017931	0.046552	0.964477	3	1.4139	963
CNIH1	3	0.01797	0.046636	0.964477	3	2.1289	965
GLYCTK	3	0.018038	0.046819	0.964477	2	2.7899	966
OR52N2	3	0.018044	0.04683	0.964477	2	2.1564	967
PMP2	3	0.018056	0.04686	0.964477	3	1.389	968
DOCK4	3	0.018062	0.046877	0.964477	3	2.0281	969
MIDN	3	0.018078	0.046917	0.964477	3	1.6687	970
RERGL	3	0.01813	0.047029	0.964477	2	2.8595	971
NSUN7	3	0.018165	0.047103	0.964477	3	1.2925	972
RPS6KA6	3	0.018205	0.047201	0.964477	3	2.2724	977
SUSD1	3	0.018226	0.047246	0.964477	2	2.9547	978
TPRG1	3	0.018267	0.047347	0.965485	2	2.618	980
NUP210	3	0.018337	0.047512	0.965983	2	2.4804	981
NASP	3	0.018389	0.047626	0.965983	3	2.7008	984
OR2A5	2	0.018397	0.034097	0.94562	1	2.986	985
CDHR4	3	0.018459	0.047809	0.966791	2	2.5511	987
TIMMDC1	3	0.018476	0.047853	0.966791	3	1.1915	988
IP6K3	3	0.018503	0.047921	0.966791	3	1.1687	991
LOC730183	3	0.018674	0.048329	0.967904	2	2.0364	993
ARID3A	3	0.018752	0.048537	0.967904	3	2.0408	995
DPY19L1	2	0.018755	0.034725	0.94562	2	2.5887	996
SLC29A2	3	0.018768	0.048573	0.967904	2	2.375	998
TRMT61B	3	0.018781	0.048602	0.967904	3	1.3812	1000
PCSK6	3	0.0188	0.048653	0.967904	3	2.6197	1001
PAFAH1B1	3	0.01881	0.048676	0.967904	3	2.0011	1003
HMG20A	3	0.018865	0.048813	0.967904	2	2.7447	1004
CLECL1	3	0.018884	0.048862	0.967904	3	1.2388	1005
SGPP1	3	0.01892	0.048945	0.967904	3	1.2234	1006
CEACAM18	3	0.018928	0.04897	0.967904	3	1.3121	1007
HTRA2	3	0.018988	0.049124	0.967904	3	1.3747	1010
MTM1	3	0.019008	0.049164	0.967904	2	2.573	1011
PSCA	3	0.019025	0.049201	0.967904	3	1.1033	1012
RAB19	3	0.019034	0.049229	0.967904	2	2.3216	1013
LCMT2	3	0.019088	0.049359	0.967904	3	1.8265	1016
NCAPH2	3	0.019111	0.049417	0.967904	3	1.5383	1017
CCDC85A	3	0.019138	0.049477	0.967904	2	2.5238	1019
RHBDD2	3	0.019173	0.049561	0.967904	3	1.5707	1020
TNNT3	3	0.019186	0.049593	0.967904	3	1.1597	1021
OTUD6B	3	0.01919	0.049605	0.967904	3	1.0911	1022
ELOVL4	3	0.019211	0.049652	0.967904	3	1.701	1023
CDKN2AIP	3	0.01926	0.04977	0.967904	3	2.0928	1024
SLCO1B1	3	0.019269	0.04979	0.967904	2	2.206	1025
MARCKS	3	0.019275	0.049805	0.967904	3	2.4449	1026
KIAA1549L	3	0.019308	0.049884	0.967904	2	2.5222	1027
C6orf222	3	0.019321	0.04992	0.967904	2	2.6163	1028
MKI67	3	0.019358	0.05	0.967904	3	1.3838	1029
CD2	2	0.019967	0.036924	0.952471	2	3.2925	1054
MAS1	2	0.020324	0.037592	0.956316	2	3.0289	1071
L3HYPDH	2	0.020467	0.037853	0.956316	2	3.0485	1079
METTL23	2	0.02272	0.041972	0.964477	2	3.122	1178
WDR75	2	0.024315	0.044796	0.964477	2	3.2658	1258
ANP32D	2	0.024339	0.044837	0.964477	2	2.7542	1260
MTSS1	2	0.026536	0.048726	0.967904	2	1.779	1366
RASSF10	2	0.026875	0.049336	0.967904	2	1.5826	1376
EAPP	1	0.030022	0.029942	0.942848	1	4.1369	1543
LOC101060376	1	0.038211	0.038129	0.957816	1	3.1382	1904
CEP76	1	0.038759	0.038663	0.962471	1	3.0423	1929
TMEM220	1	0.040424	0.040319	0.964477	1	3.7319	1999
SPATA31A6	1	0.042002	0.041917	0.964477	1	3.2465	2068
SPDYE1	1	0.044482	0.044462	0.964477	1	3.0119	2156
ANKRD20A1	1	0.046082	0.046091	0.964477	1	3.1863	2231
